# Supplementary material
Source: MDPI journal article supplement (https://www.mdpi.com/2311-7524/9/11/1242)
Supplement: s1 [file s1]

**Table S1.** Changes of REC content in green prickly ash germplasm from different origins under different low temperature stress.

| Variety       | REC (%)          |                   |                  |              |
|---------------|------------------|-------------------|------------------|--------------|
|               | 0 °C             | -10 °C            | -20 °C           | -30 °C       |
| RCWC          | 34.02±2.00defg   | 66.01±2.44cdefgh  | 92.26±1.21a      | 90.30±1.15ab |
| WCFZ          | 30.03±3.48efgh   | 67.97±4.46cdefg   | 80.15±4.00bcdef  | 89.73±0.31ab |
| YL1H          | 27.62±3.32ghijk  | 60.92±3.62fghi    | 87.94±2.81abc    | 92.01±1.67ab |
| YL2H          | 17.73±3.19m      | 66.30±0.83cdefgh  | 87.01±1.70abc    | 93.19±3.94a  |
| YQ1H          | 19.23±0.99jklm   | 66.83±3.74cdefgh  | 86.45±2.85abcd   | 93.05±3.33a  |
| YQ2H          | 23.36±3.11hijklm | 66.76±1.13cdefgh  | 77.03±3.34cdef   | 92.67±1.75a  |
| HNJ           | 18.43±1.08lm     | 68.11±4.94cdefg   | 76.70±1.70cdef   | 91.23±4.44ab |
| CJ            | 20.65±2.62ijklm  | 54.69±2.30i       | 72.55±4.83f      | 87.80±4.47ab |
| XYTJ          | 18.13±0.86lm     | 71.37±1.96bcde    | 80.88±3.35bcdef  | 94.03±2.33a  |
| MLJ           | 19.12±0.90klm    | 63.35±3.67cdefghi | 85.34±0.70abcde  | 82.46±2.33b  |
| TJ            | 8.48±2.05n       | 59.00±2.54ghi     | 79.60±3.93bcdef  | 90.10±2.22ab |
| WCZP          | 16.80±2.25mn     | 61.42±3.05fghi    | 75.64±4.69def    | 86.33±0.64ab |
| HHHJ          | 19.19±4.45klm    | 70.15±2.57bcdef   | 81.54±1.34abcdef | 89.47±2.98ab |
| LFJ           | 20.60±2.27ijklm  | 67.11±3.25cdefgh  | 83.16±2.58abcdef | 91.58±3.47ab |
| TZJ           | 38.77±4.17bcde   | 62.66±2.63defghi  | 73.44±4.88ef     | 87.99±0.45ab |
| JYQ           | 28.33±3.28fghi   | 80.08±4.91ab      | 85.13±3.53abcde  | 89.88±4.03ab |
| XJ            | 37.11±2.82cdef   | 70.75±3.88bcdef   | 84.84±4.92abcde  | 88.28±4.12ab |
| SJ            | 28.37±4.41fghi   | 69.23±1.59cdef    | 82.47±2.62abcdef | 93.97±1.10a  |
| HYXJ          | 41.58±0.95abcd   | 86.63±2.56a       | 90.60±4.38ab     | 91.44±1.35ab |
| DYSJ          | 46.05±0.97ab     | 67.39±4.70cdefgh  | 81.24±2.17abcdef | 86.75±4.52ab |
| QJ            | 48.68±2.76a      | 73.55±2.59bc      | 82.95±4.78abcdef | 87.27±4.36ab |
| EWJ           | 45.40±1.49abc    | 72.20±3.40bcd     | 83.49±4.12abcdef | 88.37±2.82ab |
| SCHJ          | 15.31±3.20mn     | 57.57±2.48fhi     | 77.44±2.61cdef   | 89.80±3.25ab |
| Average value | 27.09±0.23ghijkl | 67.39±0.78cdefgh  | 82.08±0.17abcdef | 89.90±0.64   |
| F value       | 46.96**          | 13.43**           | 5.75**           | 2.36**       |

Note: Different lowercase letters in the same column represent significant difference ( $P < 0.05$ ), “\*\*\*” means the difference was extremely significant at 1% level ( $P < 0.01$ ), “\*” means the difference was significant at 5% level ( $P < 0.05$ ), the same below.

**Table S2.** Changes of SS content in green prickly ash germplasm from different origins under different low temperature stress.

| Variety       | SS ( $\mu\text{g/mL}$ ) |                      |                       |                       |
|---------------|-------------------------|----------------------|-----------------------|-----------------------|
|               | 0 °C                    | -10 °C               | -20 °C                | -30 °C                |
| RCWC          | 378.53 $\pm$ 5.56bc     | 167.77 $\pm$ 5.62j   | 394.23 $\pm$ 8.56bc   | 321.10 $\pm$ 9.30cd   |
| WCFZ          | 194.10 $\pm$ 8.20h      | 208.27 $\pm$ 10.24hi | 309.77 $\pm$ 10.09f   | 269.97 $\pm$ 2.35ef   |
| YL1H          | 174.93 $\pm$ 9.97hi     | 244.57 $\pm$ 16.01gh | 156.10 $\pm$ 7.97k    | 177.87 $\pm$ 4.69jkl  |
| YL2H          | 283.97 $\pm$ 14.80f     | 447.43 $\pm$ 10.37a  | 372.77 $\pm$ 23.20cd  | 213.17 $\pm$ 6.92hij  |
| YQ1H          | 189.97 $\pm$ 17.63h     | 231.63 $\pm$ 13.27gh | 291.87 $\pm$ 1.79f    | 328.27 $\pm$ 13.73c   |
| YQ2H          | 410.00 $\pm$ 9.05ab     | 337.43 $\pm$ 18.65cd | 385.53 $\pm$ 0.92c    | 256.63 $\pm$ 13.64efg |
| HNJ           | 163.60 $\pm$ 19.35hi    | 257.57 $\pm$ 14.81fg | 383.00 $\pm$ 7.57cd   | 240.27 $\pm$ 15.70fgh |
| CJ            | 300.00 $\pm$ 14.37ef    | 320.80 $\pm$ 14.38de | 277.00 $\pm$ 11.92fg  | 290.40 $\pm$ 1.50de   |
| XYTJ          | 410.53 $\pm$ 14.03ab    | 208.27 $\pm$ 14.86hi | 422.40 $\pm$ 15.07ab  | 197.30 $\pm$ 10.47ijk |
| MLJ           | 195.63 $\pm$ 5.56h      | 444.80 $\pm$ 9.47a   | 384.00 $\pm$ 10.83c   | 224.93 $\pm$ 12.50ghi |
| TJ            | 344.93 $\pm$ 10.99cd    | 295.07 $\pm$ 11.76ef | 204.77 $\pm$ 12.50ij  | 181.63 $\pm$ 4.74jkl  |
| WCZP          | 240.43 $\pm$ 11.47g     | 325.37 $\pm$ 4.94de  | 448.47 $\pm$ 12.00a   | 138.97 $\pm$ 11.63m   |
| HHHJ          | 188.57 $\pm$ 12.48h     | 424.47 $\pm$ 13.99a  | 177.87 $\pm$ 16.94ijk | 147.20 $\pm$ 15.56lm  |
| LFJ           | 269.00 $\pm$ 10.90fg    | 315.13 $\pm$ 4.94de  | 250.00 $\pm$ 17.66gh  | 420.37 $\pm$ 6.21a    |
| TZJ           | 394.53 $\pm$ 14.11ab    | 411.10 $\pm$ 16.31ab | 425.97 $\pm$ 7.91ab   | 190.93 $\pm$ 16.21ijk |
| JYQ           | 334.33 $\pm$ 14.81de    | 420.87 $\pm$ 8.49a   | 196.80 $\pm$ 4.06ij   | 163.13 $\pm$ 4.94klm  |
| XJ            | 329.67 $\pm$ 4.12de     | 439.83 $\pm$ 4.94a   | 368.67 $\pm$ 13.65cd  | 382.83 $\pm$ 13.75b   |
| SJ            | 351.93 $\pm$ 10.11cd    | 437.30 $\pm$ 9.63a   | 205.00 $\pm$ 5.37ij   | 356.57 $\pm$ 5.56bc   |
| HYXJ          | 327.07 $\pm$ 3.27de     | 261.73 $\pm$ 20.84fg | 169.17 $\pm$ 10.75jk  | 272.20 $\pm$ 3.87ef   |
| DYSJ          | 267.90 $\pm$ 7.66fg     | 191.37 $\pm$ 13.88ij | 214.17 $\pm$ 6.91hi   | 323.67 $\pm$ 15.55cd  |
| QJ            | 419.37 $\pm$ 12.96a     | 371.57 $\pm$ 18.84bc | 310.87 $\pm$ 10.85ef  | 332.43 $\pm$ 16.21c   |
| EWJ           | 289.20 $\pm$ 6.80f      | 366.97 $\pm$ 12.54c  | 346.70 $\pm$ 8.46de   | 165.70 $\pm$ 15.46klm |
| SCHJ          | 146.03 $\pm$ 10.14i     | 208.83 $\pm$ 12.54hi | 364.57 $\pm$ 20.03cd  | 253.17 $\pm$ 20.84fg  |
| Average value | 287.14 $\pm$ 0.50f      | 319.05 $\pm$ 3.04de  | 306.94 $\pm$ 2.59f    | 254.34 $\pm$ 3.05efg  |
| F value       | 171.19**                | 154.75**             | 181.86**              | 136.41**              |

**Table S3.** Changes of SP content in green prickly ash germplasm from different origins under different low temperature stress.

| Variety       | SP (ng/mL)     |                 |                 |                 |
|---------------|----------------|-----------------|-----------------|-----------------|
|               | 0 °C           | -10 °C          | -20 °C          | -30 °C          |
| RCWC          | 178.87±2.87d   | 132.30±4.80i    | 185.97±6.52de   | 189.03±7.48ghij |
| WCFZ          | 165.90±1.73def | 156.13±3.97hi   | 237.50±4.06a    | 187.10±4.84ghij |
| YL1H          | 162.57±2.27efg | 197.07±1.19cdef | 148.23±2.27hi   | 200.83±2.68defg |
| YL2H          | 149.43±3.96gh  | 167.03±1.96gh   | 211.83±3.42bc   | 221.67±3.16abc  |
| YQ1H          | 132.00±2.60i   | 180.17±5.64efgh | 184.47±7.35de   | 165.30±6.91k    |
| YQ2H          | 133.27±4.82i   | 198.73±4.56cdef | 207.70±1.41bc   | 193.43±4.45efgh |
| HNJ           | 208.70±2.88bc  | 175.50±5.11fgh  | 147.50±3.48hij  | 209.60±8.61bcde |
| CJ            | 162.73±3.44efg | 213.80±3.82abcd | 195.40±6.21cd   | 231.97±4.56a    |
| XYTJ          | 159.33±2.25fg  | 233.33±3.73a    | 157.47±4.25fghi | 165.50±6.91k    |
| MLJ           | 164.80±4.28ef  | 133.07±6.75i    | 159.37±8.81fgh  | 123.50±4.37m    |
| TJ            | 168.00±4.03def | 220.93±4.55abc  | 154.30±3.14ghi  | 206.37±4.05cdef |
| WCZP          | 168.33±4.27def | 156.30±3.59hi   | 220.90±3.92b    | 187.63±4.60ghij |
| HHHJ          | 150.70±2.10gh  | 226.97±4.74ab   | 131.67±7.20jk   | 176.77±3.88ijk  |
| LFJ           | 178.50±4.87d   | 190.73±3.96defg | 130.33±5.78k    | 218.73±2.87abc  |
| TZJ           | 214.93±1.81ab  | 231.47±4.54ab   | 185.17±5.12de   | 209.80±3.42bcde |
| JYQ           | 171.93±3.44def | 157.63±4.60hi   | 142.77±6.62ijk  | 191.57±5.25fghi |
| XJ            | 142.80±4.03hi  | 199.33±7.48cdef | 164.93±3.75fg   | 179.60±4.73hijk |
| SJ            | 173.80±4.90de  | 215.33±2.01abcd | 172.60±3.48ef   | 141.70±4.65l    |
| HYXJ          | 224.50±4.88a   | 132.83±4.05i    | 170.50±5.98efg  | 147.40±4.83l    |
| DYSJ          | 204.00±7.30bc  | 230.00±1.70ab   | 161.70±2.90fgh  | 174.90±6.81jk   |
| QJ            | 199.50±3.14c   | 237.60±7.69a    | 209.23±9.15bc   | 224.00±4.84ab   |
| EWJ           | 210.97±0.86bc  | 205.17±3.93bcde | 146.40±2.40hijk | 200.30±7.30defg |
| SCHJ          | 206.10±7.62bc  | 217.93±4.75abcd | 161.83±2.87fgh  | 199.57±4.62defg |
| Average value | 175.29±0.77de  | 191.71±0.98defg | 173.38±0.54ef   | 188.97±1.91ghij |
| F value       | 113.16**       | 44.28**         | 89.77**         | 80.07**         |

**Table S4.** Changes of PRO content in green prickly ash germplasm from different origins under different low temperature stress.

| Variety        | PRO (ng/mL)   |              |              |              |
|----------------|---------------|--------------|--------------|--------------|
|                | 0 °C          | -10 °C       | -20 °C       | -30 °C       |
| RCWC           | 7.43±0.29cde  | 7.26±0.19b   | 3.52±0.27l   | 3.92±0.16k   |
| WCFZ           | 5.48±0.09ij   | 3.78±0.26h   | 3.82±0.09jkl | 6.39±0.20efg |
| YL1H           | 4.64±0.14l    | 7.90±0.06a   | 3.75±0.25kl  | 4.95±0.37ij  |
| YL2H           | 3.69±0.18m    | 6.58±0.08c   | 5.32±0.12fg  | 6.90±0.19cde |
| YQ1H           | 6.89±0.16efg  | 5.21±0.17def | 4.12±0.30jk  | 3.77±0.33k   |
| YQ2H           | 7.34±0.20def  | 6.58±0.08c   | 6.40±0.16cd  | 6.39±0.18efg |
| HNJ            | 6.73±0.15fg   | 4.97±0.14efg | 4.33±0.26ij  | 5.83±0.20gh  |
| CJ             | 7.62±0.09abcd | 3.67±0.29h   | 4.18±0.18ijk | 4.33±0.16jk  |
| XYTJ           | 6.35±0.18gh   | 4.90±0.22fg  | 4.71±0.10hi  | 7.28±0.21bc  |
| MLJ            | 8.10±0.03ab   | 3.86±0.27h   | 4.23±0.10ijk | 6.13±0.06fg  |
| TJ             | 7.50±0.21bcd  | 5.34±0.31def | 3.80±0.13jkl | 6.56±0.19def |
| WCZP           | 3.65±0.08m    | 4.50±0.39g   | 5.93±0.19de  | 7.13±0.26bcd |
| HHHJ           | 5.34±0.33jk   | 5.40±0.17def | 3.94±0.19jkl | 6.04±0.17fg  |
| LFJ            | 8.20±0.17a    | 4.78±0.16fg  | 5.12±0.12gh  | 6.09±0.16fg  |
| TZJ            | 6.00±0.18hi   | 3.33±0.17h   | 4.25±0.12ijk | 4.66±0.11ij  |
| JYQ            | 5.35±0.25jk   | 7.14±0.35bc  | 7.76±0.14a   | 5.92±0.16fg  |
| XJ             | 7.47±0.17cde  | 7.04±0.12bc  | 7.02±0.06b   | 8.33±0.17a   |
| SJ             | 4.74±0.19kl   | 5.60±0.16de  | 7.69±0.18a   | 6.27±0.16efg |
| HYXJ           | 7.87±0.36abcd | 6.89±0.13bc  | 6.13±0.14de  | 5.80±0.33gh  |
| DYSJ           | 4.90±0.26jkl  | 5.33±0.18def | 5.68±0.20ef  | 7.65±0.17b   |
| QJ             | 6.41±0.26gh   | 6.79±0.12bc  | 5.32±0.24fg  | 7.71±0.11ab  |
| EWJ            | 8.05±0.13abc  | 5.71±0.09d   | 7.04±0.22b   | 5.18±0.20hi  |
| SCHJ           | 5.20±0.14jkl  | 5.35±0.16def | 6.71±0.15bc  | 7.28±0.29bc  |
| Average value  | 6.30±0.00gh   | 5.56±0.05de  | 5.25±0.04fgh | 6.11±0.01fg  |
| <i>F</i> value | 151.53**      | 117.51**     | 166.82**     | 99.89**      |

**Table S5.** Changes of SOD content in green prickly ash germplasm from different origins under different low temperature stress.

| Variety        | SOD(U/mL)     |               |                |               |
|----------------|---------------|---------------|----------------|---------------|
|                | 0 °C          | -10 °C        | -20 °C         | -30 °C        |
| RCWC           | 120.52±3.29de | 167.99±8.42ab | 43.43±4.69k    | 71.39±4.69hij |
| WCFZ           | 90.06±6.98f   | 103.86±1.45fg | 117.03±3.82f   | 104.27±6.03cd |
| YL1H           | 41.47±1.86j   | 152.00±3.71c  | 154.50±3.73bc  | 84.15±3.68fgh |
| YL2H           | 107.22±5.37e  | 43.96±7.89lmn | 176.10±4.07a   | 42.77±4.54k   |
| YQ1H           | 131.13±5.62d  | 39.34±4.67mn  | 149.14±1.75bcd | 37.16±5.84k   |
| YQ2H           | 185.88±4.27a  | 37.04±4.34mn  | 56.24±2.83ij   | 39.67±4.51k   |
| HNJ            | 116.28±4.59e  | 49.94±4.34klm | 84.34±2.65h    | 68.10±5.73ij  |
| CJ             | 168.14±4.71b  | 131.59±4.70de | 134.62±6.31e   | 126.51±6.04b  |
| XYTJ           | 153.88±5.14c  | 137.95±1.46cd | 175.33±2.50a   | 118.19±3.23bc |
| MLJ            | 65.77±3.76hi  | 173.00±7.37a  | 96.19±3.59gh   | 79.13±5.20ghi |
| TJ             | 150.98±6.10c  | 96.94±4.34gh  | 156.79±3.50b   | 60.49±2.91j   |
| WCZP           | 72.08±1.21ghi | 152.07±6.82c  | 182.99±3.50a   | 167.87±6.04a  |
| HHHJ           | 184.55±3.22a  | 153.03±3.39bc | 138.89±3.19de  | 100.20±6.09de |
| LFJ            | 156.05±5.55bc | 96.94±6.97gh  | 139.47±5.27de  | 165.36±7.81a  |
| TZJ            | 69.39±4.10ghi | 86.33±4.49hi  | 112.00±4.51f   | 128.54±2.65b  |
| JYQ            | 58.79±4.67i   | 63.00±2.65jk  | 142.56±4.75cde | 131.24±3.72b  |
| XJ             | 35.88±6.75j   | 78.24±2.34ij  | 98.66±2.20g    | 159.39±2.74a  |
| SJ             | 106.94±3.18e  | 32.93±4.52n   | 84.15±4.86h    | 69.55±5.04ij  |
| HYXJ           | 81.71±2.31fg  | 57.03±2.34kl  | 62.49±9.01i    | 66.08±2.09ij  |
| DYSJ           | 86.72±4.91f   | 60.31±4.26k   | 116.26±3.35f   | 69.35±1.86ij  |
| QJ             | 114.64±6.36e  | 63.58±6.44jk  | 134.05±1.21e   | 104.83±3.06cd |
| EWJ            | 78.05±3.28fgh | 118.91±6.37ef | 44.51±3.23jk   | 87.86±5.62efg |
| SCHJ           | 164.87±3.06bc | 60.89±4.92k   | 113.97±1.15f   | 106.37±2.03cd |
| Average value  | 110.48±1.14e  | 93.78±0.70ghi | 117.99±1.25f   | 95.15±0.29def |
| <i>F</i> value | 284.94**      | 245.15**      | 307.05**       | 204.52**      |

**Table S6.** Changes of POD content in green prickly ash germplasm from different origins under different low temperature stress.

| Variety        | POD (U/L)       |                 |                 |                  |
|----------------|-----------------|-----------------|-----------------|------------------|
|                | 0 °C            | -10 °C          | -20 °C          | -30 °C           |
| RCWC           | 251.63±3.61ij   | 323.27±12.47fgh | 270.43±10.49gh  | 296.07±9.32ghij  |
| WCFZ           | 349.13±1.79cd   | 269.67±14.56jk  | 271.13±5.77gh   | 349.73±4.84de    |
| YL1H           | 364.63±5.77bc   | 248.73±9.77klm  | 214.07±6.81k    | 248.13±14.83mn   |
| YL2H           | 348.83±7.58cd   | 341.47±7.71efg  | 405.07±10.65a   | 399.70±7.18a     |
| YQ1H           | 393.50±11.89a   | 355.57±3.90cde  | 250.93±14.13hij | 346.00±8.74def   |
| YQ2H           | 316.90±10.95efg | 235.00±8.87lmn  | 304.20±3.64ef   | 320.17±10.29fg   |
| HNJ            | 295.27±7.29h    | 315.79±3.62gh   | 225.57±10.30jk  | 279.73±14.41jkl  |
| CJ             | 365.33±8.73bc   | 401.93±6.03a    | 350.80±9.14c    | 266.80±2.14klm   |
| XYTJ           | 299.03±6.03gh   | 344.90±11.18def | 376.90±2.42b    | 241.37±4.10mn    |
| MLJ            | 293.53±6.45h    | 389.57±8.93ab   | 251.30±7.95hi   | 242.37±7.92mn    |
| TJ             | 313.80±7.98efgh | 231.27±11.27lmn | 308.70±4.37ef   | 313.83±7.74gh    |
| WCZP           | 308.53±8.33fgh  | 237.80±5.84lmn  | 396.97±11.34ab  | 290.77±9.14hijk  |
| HHHJ           | 251.80±6.71ij   | 218.93±9.72n    | 288.93±3.05fg   | 265.07±2.57klm   |
| LFJ            | 333.23±9.61de   | 383.10±9.15ab   | 340.57±9.27cd   | 360.60±3.11bcde  |
| TZJ            | 234.30±7.89j    | 372.47±13.41bc  | 263.40±4.68gh   | 260.30±4.78lm    |
| JYQ            | 401.27±1.15a    | 317.63±4.26fgh  | 401.73±8.66ab   | 370.40±11.33bcd  |
| XJ             | 261.80±2.14i    | 279.90±2.14ij   | 305.23±3.66ef   | 355.83±4.22cde   |
| SJ             | 269.03±3.61i    | 237.43±3.88lmn  | 229.80±8.35ijk  | 311.13±12.14gh   |
| HYXJ           | 382.03±7.21ab   | 370.43±1.58bcd  | 271.27±5.61gh   | 283.67±12.86ijkl |
| DYSJ           | 388.20±8.84a    | 257.30±9.19jkl  | 319.83±10.04de  | 231.83±10.22n    |
| QJ             | 248.37±3.16ij   | 222.67±7.42mn   | 309.97±10.22ef  | 342.60±3.84ef    |
| EWJ            | 381.67±5.85ab   | 396.80±12.04ab  | 341.90±5.10cd   | 387.70±12.73ab   |
| SCHJ           | 326.53±2.70ef   | 238.13±10.76lmn | 336.20±10.95cd  | 381.93±6.21abc   |
| Average value  | 320.80±1.40ef   | 303.90±1.64hi   | 305.87±2.88ef   | 310.68±1.98ghi   |
| <i>F</i> value | 168.92**        | 156.03**        | 138.82**        | 102.06**         |

**Table S7.** Changes of CAT content in green prickly ash germplasm from different origins under different low temperature stress.

| Variety        | CAT(U/mL)     |                |              |               |
|----------------|---------------|----------------|--------------|---------------|
|                | 0 °C          | -10 °C         | -20 °C       | -30 °C        |
| RCWC           | 45.32±1.39fgh | 61.74±1.10def  | 70.94±1.82de | 86.27±2.06a   |
| WCFZ           | 72.98±2.70c   | 46.72±1.18jk   | 51.75±1.41gh | 79.75±0.87bc  |
| YL1H           | 73.78±2.88b   | 81.38±2.19a    | 64.81±0.42ef | 43.17±0.68lm  |
| YL2H           | 78.36±1.73bc  | 73.24±3.39b    | 63.08±1.64f  | 46.71±1.75kl  |
| YQ1H           | 50.08±2.09fg  | 51.60±1.90hij  | 45.82±1.67hi | 53.13±2.45ij  |
| YQ2H           | 52.51±2.26ef  | 44.64±0.42k    | 63.08±3.02f  | 48.61±0.87jkl |
| HNJ            | 39.03±2.97h   | 67.98±2.57bcd  | 47.73±1.80gh | 72.51±1.66de  |
| CJ             | 47.66±2.50fg  | 50.25±4.10ijk  | 89.39±0.98a  | 51.86±1.85ijk |
| XYTJ           | 51.88±0.71f   | 68.44±2.86bcd  | 82.17±1.76bc | 53.49±1.81ij  |
| MLJ            | 62.56±3.56d   | 50.43±2.11ijk  | 83.08±3.32ab | 62.55±3.29fg  |
| TJ             | 64.81±2.16d   | 72.47±1.28b    | 79.98±0.69bc | 52.35±0.57ijk |
| WCZP           | 79.57±1.96abc | 60.63±3.81ef   | 50.87±3.80gh | 68.04±3.52ef  |
| HHHJ           | 77.94±1.44c   | 69.21±1.36bc   | 67.71±1.65ef | 86.89±1.69a   |
| LFJ            | 85.45±1.72ab  | 60.09±2.87efg  | 75.50±2.20cd | 61.00±1.34gh  |
| TZJ            | 59.39±2.31de  | 53.67±1.08ghi  | 82.83±2.28ab | 61.45±0.27g   |
| JYQ            | 59.30±2.26de  | 73.37±2.07b    | 53.22±2.88g  | 55.59±2.46hi  |
| XJ             | 86.09±0.27a   | 71.92±2.26b    | 51.50±2.11gh | 53.07±2.11ij  |
| SJ             | 43.91±2.37gh  | 58.28±2.71efgh | 78.67±2.34bc | 76.43±1.63cd  |
| HYXJ           | 49.79±1.66fg  | 45.54±0.71jk   | 79.84±2.11bc | 57.22±0.57ghi |
| DYSJ           | 46.17±3.68fgh | 51.14±1.64ijk  | 39.91±2.79i  | 72.37±0.56de  |
| QJ             | 64.46±1.91d   | 55.66±2.20fghi | 84.91±2.00ab | 39.72±0.95m   |
| EWJ            | 49.52±2.18fg  | 85.75±0.95a    | 84.37±2.47ab | 83.19±1.22ab  |
| SCHJ           | 61.49±3.56d   | 86.92±1.85a    | 52.94±1.90g  | 45.58±3.53l   |
| Average value  | 60.96±0.44d   | 62.65±0.53cde  | 67.14±0.76ef | 61.35±0.46gh  |
| <i>F</i> value | 111.19**      | 96.87**        | 145.04**     | 170.15**      |
